# Supplementary material for: Determinism and stochasticity in seed dispersal-successional feedbacks
Source: bioRxiv or medRxiv preprint supplement (doi:10.1101/791988), 2019-10-03
Supplement: Supplementary file [file media-1.pdf]

1 **Online Supplementary Material**

2  
3 **Determinism and stochasticity in seed dispersal-successional feedbacks**

4  
5 Nohemi Huanca Nuñez<sup>1</sup>, Robin L. Chazdon<sup>2</sup>, Sabrina E. Russo<sup>1</sup>

6  
7  
8 *<sup>1</sup>School of Biological Sciences, University of Nebraska, Lincoln, NE 68588-0118, USA*

9 *<sup>2</sup>Department of Ecology and Evolutionary Biology, University of Connecticut, Storrs,*

10 *Connecticut 06269-3043 USA*

11 \*Correspondence: E-Mail: [nohemihuanca@huskers.unl.edu](mailto:nohemihuanca@huskers.unl.edu); telephone: 402-472-2720

## 12 **Appendix S1: Supplemental Methods Section**

### 13 *Statistical Analysis: Constructing seed rain community matrices*

14 All analyses were performed in R statistical software (R Core Development Team, 2019). We  
15 constructed community matrices of the seed rain data in which each cell is the total number of all  
16 seeds of each species recorded in each trap in a plot, summed over the 24 monitoring months in a  
17 time period, separately for time periods 1997-1999 and 2015-2017 for a total of nine abundance  
18 community matrices. Based on the abundance matrices, we created incidence matrices  
19 (presence/absence of species within a trap). We used these matrices for all analyses. Although the  
20 seed rain in the mature forest was only quantified for time period 2015-2017, we assumed that the  
21 composition of the seed rain of the mature forest would be similar in 1997-1999 since no major  
22 disturbances or changes in forest structure have occurred to the mature forest plot. We therefore  
23 compared data from the successional plots in both time periods with the mature forest data  
24 collected in 2015-2017.

25 Using only successional plots at each time period (1997-1999 and 2015-2017), we  
26 determined species present during the 12 consecutive months at each time period. Also, using a  
27 generalized negative binomial model, where number of seeds was the response variable, trap and  
28 time periods were fixed factors and plot, month and species as random factors, we calculated which  
29 time period had higher species seed abundance by  $m^2$ . A similar model where plot and time period  
30 were fixed factors and, trap, month and species were random effects, calculated the species with  
31 highest and lowest abundance across all the successional plot.

32 **Table S1.** List of codes, scientific names, and family for all species in this study.

| N  | Code   | Genus                 | Species               | Family           |
|----|--------|-----------------------|-----------------------|------------------|
| 1  | Abemos | <i>Abelmoschus</i>    | <i>moschatus</i>      | Malvaceae        |
| 2  | Abupan | <i>Abuta</i>          | <i>panamensis</i>     | Menispermaceae   |
| 3  | Acahay | <i>Acacia</i>         | <i>hayesii</i>        | Leguminosae      |
| 4  | Acaten | <i>Acacia</i>         | <i>tenuifolia</i>     | Leguminosae      |
| 5  | Aegela | <i>Aegiphila</i>      | <i>elata</i>          | Lamiaceae        |
| 6  | Albsp  | <i>Albizia</i>        | <i>sp</i>             | Leguminosae      |
| 7  | Alcflo | <i>Alchorneopsis</i>  | <i>floribunda</i>     | Euphorbiaceae    |
| 8  | Allplu | <i>Allomarkgrafia</i> | <i>plumeriiflora</i>  | Apocynaceae      |
| 9  | Anacra | <i>Anaxagorea</i>     | <i>crassipetala</i>   | Annonaceae       |
| 10 | Annpap | <i>Annona</i>         | <i>papilionella</i>   | Annonaceae       |
| 11 | Annsp  | <i>Annona</i>         | <i>sp</i>             | Annonaceae       |
| 12 | Anoret | <i>Anomospermum</i>   | <i>reticulatum</i>    | Menispermaceae   |
| 13 | Apemem | <i>Apeiba</i>         | <i>membranacea</i>    | Malvaceae        |
| 14 | Ardfim | <i>Ardisia</i>        | <i>fimbrillifera</i>  | Primulaceae      |
| 15 | Ardnig | <i>Ardisia</i>        | <i>nigropunctata</i>  | Primulaceae      |
| 16 | Arispr | <i>Aristolochia</i>   | <i>sprucei</i>        | Aristolochiaceae |
| 17 | Arrflo | <i>Arrabidea</i>      | <i>florida</i>        | Bignoniaceae     |
| 18 | Astcon | <i>Astrocaryum</i>    | <i>confertum</i>      | Arecaceae        |
| 19 | Bachon | <i>Bactris</i>        | <i>hondurensis</i>    | Arecaceae        |
| 20 | Balele | <i>Balizia</i>        | <i>elegans</i>        | Leguminosae      |
| 21 | Bighya | <i>Bignonia</i>       | <i>hyacinthina</i>    | Bignoniaceae     |
| 22 | Brolac | <i>Brosimum</i>       | <i>lactescens</i>     | Moraceae         |
| 23 | Bunoce | <i>Bunchonsia</i>     | <i>ocellata</i>       | Malpighiaceae    |
| 24 | Byrart | <i>Byrsonima</i>      | <i>arthropoda</i>     | Malpighiaceae    |
| 25 | Byrcra | <i>Byrsonima</i>      | <i>crassifolia</i>    | Malpighiaceae    |
| 26 | Calbra | <i>Calophyllum</i>    | <i>brasiliense</i>    | Clusiaceae       |
| 27 | Casarb | <i>Casearia</i>       | <i>arborea</i>        | Salicaceae       |
| 28 | Cedodo | <i>Cedrela</i>        | <i>odorata</i>        | Meliaceae        |
| 29 | Cesspa | <i>Cespedesia</i>     | <i>spathulata</i>     | Ochnaceae        |
| 30 | Chrncl | <i>Chrysochlamys</i>  | <i>nicaraguensis</i>  | Clusiaceae       |
| 31 | Cismic | <i>Cissus</i>         | <i>microcarpa</i>     | Vitaceae         |
| 32 | Cispse | <i>Cissus</i>         | <i>pseudocyoides</i>  | Vitaceae         |
| 33 | Cissp  | <i>Cissus</i>         | <i>sp</i>             | Vitaceae         |
| 34 | Cistro | <i>Cissampelos</i>    | <i>tropaeolifolia</i> | Menispermaceae   |
| 35 | Cisver | <i>Cissus</i>         | <i>verticillata</i>   | Vitaceae         |
| 36 | Commex | <i>Compsoneura</i>    | <i>mexicana</i>       | Myristicaceae    |
| 37 | Conple | <i>Conceveiba</i>     | <i>pleiostemona</i>   | Euphorbiaceae    |
| 38 | Corbic | <i>Cordia</i>         | <i>bicolor</i>        | Boraginaceae     |
| 39 | Crywar | <i>Cryosophila</i>    | <i>warscewiczii</i>   | Arecaceae        |
| 40 | Cucsp  | <i>Cucurbitaceae</i>  | <i>sp</i>             | Cucurbitaceae    |
| 41 | Cupgla | <i>Cupania</i>        | <i>glabra</i>         | Sapindaceae      |
| 42 | Cupliv | <i>Cupania</i>        | <i>livida</i>         | Sapindaceae      |
| 43 | Davkun | <i>Davila</i>         | <i>kunthii</i>        | Dilleniaceae     |
| 44 | Davnit | <i>Davila</i>         | <i>nitida</i>         | Dilleniaceae     |
| 45 | Denarb | <i>Dendropanax</i>    | <i>arboreus</i>       | Araliaceae       |
| 46 | Dicamp | <i>Dicranostyles</i>  | <i>ampla</i>          | Convolvulaceae   |
| 47 | Dilsp  | <i>Dillacarapacea</i> | <i>sp</i>             | Dillacarapaceae  |

|    |        |                     |                       |                 |
|----|--------|---------------------|-----------------------|-----------------|
| 48 | Dolmul | <i>Doliocarpus</i>  | <i>multiflorus</i>    | Dilleniaceae    |
| 49 | Dugsp  | <i>Duguetia</i>     | <i>sp</i>             | Annonaceae      |
| 50 | Eugsar | <i>Eugenia</i>      | <i>sarapiquensis</i>  | Myrtaceae       |
| 51 | Eugsp  | <i>Eugenia</i>      | <i>sp</i>             | Myrtaceae       |
| 52 | Eutole | <i>Euterpe</i>      | <i>oleracea</i>       | Arecaceae       |
| 53 | Eutpre | <i>Euterpe</i>      | <i>precatoria</i>     | Arecaceae       |
| 54 | Fargla | <i>Faramea</i>      | <i>glandulosa</i>     | Rubiaceae       |
| 55 | Farsp  | <i>Faramea</i>      | <i>sp</i>             | Rubiaceae       |
| 56 | Frisch | <i>Fridericia</i>   | <i>schumanniana</i>   | Bignoniaceae    |
| 57 | Galsp  | <i>Gallesia</i>     | <i>sp</i>             | Lauraceae       |
| 58 | Geocon | <i>Geonoma</i>      | <i>congesta</i>       | Arecaceae       |
| 59 | Goemei | <i>Goethalsia</i>   | <i>meiantha</i>       | Malvaceae       |
| 60 | Goulup | <i>Gouania</i>      | <i>lupuloides</i>     | Rhamnaceae      |
| 61 | Goupol | <i>Gouania</i>      | <i>polygama</i>       | Rhamnaceae      |
| 62 | Guaaer | <i>Guatteria</i>    | <i>aeruginosa</i>     | Annonaceae      |
| 63 | Guaamp | <i>Guatteria</i>    | <i>amplifolia</i>     | Annonaceae      |
| 64 | Guadio | <i>Guatteria</i>    | <i>diospyroides</i>   | Annonaceae      |
| 65 | Guagui | <i>Guarea</i>       | <i>guidonia</i>       | Meliaceae       |
| 66 | Guarec | <i>Guatteria</i>    | <i>recurvisepala</i>  | Annonaceae      |
| 67 | Hamapp | <i>Hampea</i>       | <i>appendiculata</i>  | Malvaceae       |
| 68 | Heisca | <i>Heisteria</i>    | <i>scandens</i>       | Olacaceae       |
| 69 | Helapp | <i>Heliocarpus</i>  | <i>appendiculatus</i> | Malvaceae       |
| 70 | Herdid | <i>Hernandia</i>    | <i>didymantha</i>     | Hernandiaceae   |
| 71 | Hetsp  | <i>Heteropteris</i> | <i>sp</i>             | Malpighiaceae   |
| 72 | Ilesku | <i>Ilex</i>         | <i>skutchii</i>       | Aquifoliaceae   |
| 73 | Ingalb | <i>Inga</i>         | <i>alba</i>           | Leguminosae     |
| 74 | Ingexa | <i>Inga</i>         | <i>exalata</i>        | Leguminosae     |
| 75 | Ingoer | <i>Inga</i>         | <i>oerstediana</i>    | Leguminosae     |
| 76 | Ingpun | <i>Inga</i>         | <i>punctata</i>       | Leguminosae     |
| 77 | Ingsp  | <i>Inga</i>         | <i>sp</i>             | Leguminosae     |
| 78 | Ingthi | <i>Inga</i>         | <i>thibaudiana</i>    | Leguminosae     |
| 79 | Ingumb | <i>Inga</i>         | <i>umbellifera</i>    | Leguminosae     |
| 80 | Iridel | <i>Iriartea</i>     | <i>deltoidea</i>      | Arecaceae       |
| 81 | Jaccop | <i>Jacaranda</i>    | <i>copaia</i>         | Bignoniaceae    |
| 82 | Jubwil | <i>Jubelina</i>     | <i>wilburii</i>       | Malpighiaceae   |
| 83 | Laepro | <i>Laetia</i>       | <i>procera</i>        | Salicaceae      |
| 84 | Licmis | <i>Licaria</i>      | <i>misanthae</i>      | Lauraceae       |
| 85 | Lozpit | <i>Lozania</i>      | <i>pittieri</i>       | Lacistemataceae |
| 86 | Mabocc | <i>Mabea</i>        | <i>occidentalis</i>   | Euphorbiaceae   |
| 87 | Macsen | <i>Machaerium</i>   | <i>senmani</i>        | Leguminosae     |
| 88 | Manhir | <i>Mandevilla</i>   | <i>hirsuta</i>        | Apocynaceae     |
| 89 | Marnic | <i>Maripa</i>       | <i>nicaraguensis</i>  | Convolvulaceae  |
| 90 | Mensp  | <i>Mendoncia</i>    | <i>sp</i>             | Acanthaceae     |
| 91 | Necmem | <i>Nectandra</i>    | <i>membranacea</i>    | Lauraceae       |
| 92 | Ococer | <i>Ocotea</i>       | <i>cernua</i>         | Lauraceae       |
| 93 | Ormsub | <i>Ormosia</i>      | <i>subsimplax</i>     | Leguminosae     |
| 94 | Paslob | <i>Passiflora</i>   | <i>lobata</i>         | Passifloraceae  |
| 95 | Paugra | <i>Paullinia</i>    | <i>granatensis</i>    | Sapindaceae     |
| 96 | Paugrn | <i>Paullinia</i>    | <i>grandifolia</i>    | Sapindaceae     |
| 97 | Pauing | <i>Paullinia</i>    | <i>ingifolia</i>      | Sapindaceae     |
| 98 | Pauobo | <i>Paullinia</i>    | <i>obovata</i>        | Sapindaceae     |

|     |        |                           |                      |                |
|-----|--------|---------------------------|----------------------|----------------|
| 99  | Pausp  | <i>Paullinia</i>          | <i>sp</i>            | Sapindaceae    |
| 100 | Penmac | <i>Pentaclethra</i>       | <i>macroloba</i>     | Leguminosae    |
| 101 | Phagui | <i>Phanera</i>            | <i>guianensis</i>    | Leguminosae    |
| 102 | Phopul | <i>Pholidostachys</i>     | <i>pulchra</i>       | Areaceae       |
| 103 | Pincor | <i>Pinzona</i>            | <i>coriacea</i>      | Dilleniaceae   |
| 104 | Pippoe | <i>Piptocarpha</i>        | <i>poepigiana</i>    | Compositae     |
| 105 | Plusti | <i>Plukenetia</i>         | <i>stipellata</i>    | Euphorbiaceae  |
| 106 | Posgra | <i>Posoqueria</i>         | <i>grandiflora</i>   | Rubiaceae      |
| 107 | Poubic | <i>Pourouma</i>           | <i>bicolor</i>       | Urticaceae     |
| 108 | Poudur | <i>Pouteria</i>           | <i>durlandii</i>     | Sapotaceae     |
| 109 | Poumin | <i>Pourouma</i>           | <i>minor</i>         | Urticaceae     |
| 110 | Procos | <i>Protium</i>            | <i>costaricense</i>  | Burseraceae    |
| 111 | Propan | <i>Protium</i>            | <i>panamense</i>     | Burseraceae    |
| 112 | Propit | <i>Protium</i>            | <i>pittieri</i>      | Burseraceae    |
| 113 | Prorav | <i>Protium</i>            | <i>ravenii</i>       | Burseraceae    |
| 114 | Psybra | <i>Psychotria</i>         | <i>brachiata</i>     | Rubiaceae      |
| 115 | Psyela | <i>Psychotria</i>         | <i>elata</i>         | Rubiaceae      |
| 116 | Psymar | <i>Psychotria</i>         | <i>marginata</i>     | Rubiaceae      |
| 117 | Psyoff | <i>Psychotria</i>         | <i>officinalis</i>   | Rubiaceae      |
| 118 | Psypan | <i>Psychotria</i>         | <i>panamensis</i>    | Rubiaceae      |
| 119 | Psyrac | <i>Psychotria</i>         | <i>racemosa</i>      | Rubiaceae      |
| 120 | Psysue | <i>Psychotria</i>         | <i>suerrensis</i>    | Rubiaceae      |
| 121 | Pteroh | <i>Pterocarpus</i>        | <i>rohrii</i>        | Leguminosae    |
| 122 | Quaoch | <i>Quararibea</i>         | <i>ochrocalyx</i>    | Malvaceae      |
| 123 | Ransp  | <i>Randia</i>             | <i>sp</i>            | Rubiaceae      |
| 124 | Reisp  | <i>Reinhardtia</i>        | <i>sp</i>            | Areaceae       |
| 125 | Rhokun | <i>Rhodostemonodaphne</i> | <i>kunthiana</i>     | Lauraceae      |
| 126 | Rhyery | <i>Rhynchosia</i>         | <i>erythrinoides</i> | Leguminosae    |
| 127 | Ricdre | <i>Richeria</i>           | <i>dressleri</i>     | Phyllanthaceae |
| 128 | Rindef | <i>Rinorea</i>            | <i>deflexiflora</i>  | Violaceae      |
| 129 | Rolpit | <i>Rollinia</i>           | <i>pittieri</i>      | Annonaceae     |
| 130 | Rolsp  | <i>Rollinia</i>           | <i>sp</i>            | Annonaceae     |
| 131 | Ryaspe | <i>Ryania</i>             | <i>speciosa</i>      | Salicaceae     |
| 132 | Sensp  | <i>Senegalia</i>          | <i>sp</i>            | Leguminosae    |
| 133 | Sergon | <i>Serjania</i>           | <i>goniocarpa</i>    | Sapindaceae    |
| 134 | Serpyr | <i>Serjania</i>           | <i>pyramidata</i>    | Sapindaceae    |
| 135 | Sersp  | <i>Serjania</i>           | <i>sp</i>            | Sapindaceae    |
| 136 | Simama | <i>Simarouba</i>          | <i>amara</i>         | Simaroubaceae  |
| 137 | Sipthe | <i>Siparuna</i>           | <i>thecaphora</i>    | Siparunaceae   |
| 138 | Smidom | <i>Smilax</i>             | <i>domingensis</i>   | Smilacaceae    |
| 139 | Smimol | <i>Smilax</i>             | <i>mollis</i>        | Smilacaceae    |
| 140 | Smipur | <i>Smilax</i>             | <i>purhampuy</i>     | Smilacaceae    |
| 141 | Smisp  | <i>Smilax</i>             | <i>sp</i>            | Smilacaceae    |
| 142 | Socexo | <i>Socratea</i>           | <i>exorrhiza</i>     | Areaceae       |
| 143 | Solsp  | <i>Solanum</i>            | <i>sp</i>            | Solanaceae     |
| 144 | Spasp  | <i>Spachea</i>            | <i>sp</i>            | Malpighiaceae  |
| 145 | Stesp  | <i>Stemmadenia</i>        | <i>sp</i>            | Apocynaceae    |
| 146 | Strmic | <i>Stryphodendron</i>     | <i>microstachyum</i> | Leguminosae    |
| 147 | Stylin | <i>Stygmaphyllum</i>      | <i>lindenianum</i>   | Malpighiaceae  |
| 148 | Swacos | <i>Swartzia</i>           | <i>costaricensis</i> | Leguminosae    |
| 149 | Taccos | <i>Tachigali</i>          | <i>costaricensis</i> | Leguminosae    |

|     |        |                      |                        |               |
|-----|--------|----------------------|------------------------|---------------|
| 150 | Tanpyr | <i>Tanaecium</i>     | <i>pyramidatum</i>     | Bignoniaceae  |
| 151 | Tapgui | <i>Tapirira</i>      | <i>guianensis</i>      | Anacardiaceae |
| 152 | Terama | <i>Terminalia</i>    | <i>amazonia</i>        | Combretaceae  |
| 153 | Tethyd | <i>Tetracera</i>     | <i>hydrophila</i>      | Dilleniaceae  |
| 154 | Tetpan | <i>Tetragastris</i>  | <i>panamensis</i>      | Burseraceae   |
| 155 | Thitom | <i>Thinouia</i>      | <i>tomocarpa</i>       | Sapindaceae   |
| 156 | Triles | <i>Trichospermum</i> | <i>lessertianum</i>    | Malvaceae     |
| 157 | Trimex | <i>Trichospermum</i> | <i>mexicanum</i>       | Malvaceae     |
| 158 | Trisep | <i>Trichilia</i>     | <i>septentrionalis</i> | Meliaceae     |
| 159 | Troinv | <i>Trophis</i>       | <i>involucrata</i>     | Moraceae      |
| 160 | Trorac | <i>Trophis</i>       | <i>racemosa</i>        | Moraceae      |
| 161 | Unopit | <i>Unonopsis</i>     | <i>pittieri</i>        | Annonaceae    |
| 162 | Unosp  | <i>Unonopsis</i>     | <i>sp</i>              | Annonaceae    |
| 163 | Virkos | <i>Virola</i>        | <i>koschnyi</i>        | Myristicaceae |
| 164 | Virseb | <i>Virola</i>        | <i>sebifera</i>        | Myristicaceae |
| 165 | Virsp  | <i>Virola</i>        | <i>sp</i>              | Myristicaceae |
| 166 | Visbac | <i>Vismia</i>        | <i>baccifera</i>       | Hypericaceae  |
| 167 | Visbil | <i>Vismia</i>        | <i>billbergiana</i>    | Hypericaceae  |
| 168 | Vitcoo | <i>Vitex</i>         | <i>cooperi</i>         | Lamiaceae     |
| 169 | Vocfer | <i>Vochysia</i>      | <i>ferruginea</i>      | Vochysiaceae  |
| 170 | Vocgua | <i>Vochysia</i>      | <i>guatemalensis</i>   | Vochysiaceae  |
| 171 | Vouano | <i>Vouarana</i>      | <i>anomala</i>         | Sapindaceae   |
| 172 | Welreg | <i>Welfia</i>        | <i>regia</i>           | Arecaceae     |
| 173 | Xylboc | <i>Xylopi</i>        | <i>bocatorena</i>      | Annonaceae    |
| 174 | Xylser | <i>Xylopi</i>        | <i>sericea</i>         | Annonaceae    |
| 175 | Xylsei | <i>Xylopi</i>        | <i>sericophylla</i>    | Annonaceae    |
| 176 | Xylsp  | <i>Xylosma</i>       | <i>sp</i>              | Salicaceae    |
| 177 | Zanekm | <i>Zanthoxylum</i>   | <i>ekmanii</i>         | Rutaceae      |
| 178 | Zansp  | <i>Zanthoxylum</i>   | <i>sp</i>              | Rutaceae      |

34 **Table S2.** Comparisons of species composition of the seed rain across four successional and  
 35 mature forest plots over two time periods in Sarapiquí, Costa Rica. Summary statistics are for post-  
 36 hoc tests after a significant pMANOVA test between successional and mature forests at each time  
 37 period (1997-1999 and 2015-2017), between successional forests at each of the two time periods,  
 38 and within successional forests across the two time periods, based on Holm-Bonferroni pairwise  
 39 comparisons. Successional forests plots were sampled over two time periods; time period 1, in  
 40 1997-1999 (A1-D1 forest plots) and time period 2 in 2015-2017 (A2-D2 forest plots), and the  
 41 mature forest (M) was sampled only in 2015-2017. All the pairs of forest plots statistically different  
 42 from each other, after adjustment for multiple comparisons, are in bold under the *p adj* column.  
 43

| <b>Successional vs. Mature Forest in 1997-1999</b> |                 |                 |                     |
|----------------------------------------------------|-----------------|-----------------|---------------------|
| <b>Plots</b>                                       | <b><i>F</i></b> | <b><i>p</i></b> | <b><i>p adj</i></b> |
| A1 and M                                           | 10.27           | 0.001           | <b>0.036</b>        |
| B1 and M                                           | 11.68           | 0.001           | <b>0.036</b>        |
| C1 and M                                           | 10.98           | 0.001           | <b>0.036</b>        |
| D1 and M                                           | 10.55           | 0.001           | <b>0.036</b>        |
| <b>Successional vs. Mature Forest in 2015-2017</b> |                 |                 |                     |
| <b>Plots</b>                                       | <b><i>F</i></b> | <b><i>p</i></b> | <b><i>p adj</i></b> |
| B2 and M                                           | 3.08            | 0.002           | <b>0.036</b>        |
| C2 and M                                           | 2.75            | 0.009           | <b>0.039</b>        |
| D2 and M                                           | 2.57            | 0.019           | <b>0.041</b>        |
| A2 and M                                           | 9.64            | 0.001           | <b>0.036</b>        |
| <b>Across successional forests in 1997-1999</b>    |                 |                 |                     |
| <b>Plots</b>                                       | <b><i>F</i></b> | <b><i>p</i></b> | <b><i>p adj</i></b> |
| A1 and B1                                          | 5.56            | 0.002           | <b>0.039</b>        |
| B1 and C1                                          | 5.28            | 0.001           | <b>0.036</b>        |
| B1 and D1                                          | 3.96            | 0.002           | <b>0.038</b>        |
| C1 and D1                                          | 4.12            | 0.001           | <b>0.036</b>        |
| <b>Across successional forests in 2015-2017</b>    |                 |                 |                     |
| <b>Plots</b>                                       | <b><i>F</i></b> | <b><i>p</i></b> | <b><i>p adj</i></b> |
| A2 and B2                                          | 7.54            | 0.001           | <b>0.036</b>        |

44

45

|                                                                    |                 |                 |                     |
|--------------------------------------------------------------------|-----------------|-----------------|---------------------|
| B2 and C2                                                          | 2.86            | 0.004           | <b>0.037</b>        |
| B2 and D2                                                          | 2.18            | 0.003           | <b>0.036</b>        |
| C2 and D2                                                          | 2.18            | 0.052           | 0.067               |
| <b>Within successional forests between 1997-1999 vs. 2015-2017</b> |                 |                 |                     |
| <b>Plot</b>                                                        | <b><i>F</i></b> | <b><i>p</i></b> | <b><i>p adj</i></b> |
| A1 and A2                                                          | 9.88            | 0.001           | <b>0.036</b>        |
| B1 and B2                                                          | 9.05            | 0.001           | <b>0.036</b>        |
| C1 and C2                                                          | 3.24            | 0.024           | <b>0.044</b>        |
| D1 and D2                                                          | 6.86            | 0.001           | <b>0.036</b>        |



46 **Table S3.** Percentage and number of observed and shared species present in the seed rain in forests  
 47 of different successional ages compared with mature forest in Sarapiquí, Costa Rica. For forest  
 48 successional age, A1, B1, C1, D1 and A2, B2, C2, D2 represent the 1997-1999 and 2015-2017  
 49 time periods, respectively. Values inside parenthesis reflect the age of the successional forest at  
 50 1997 and 2017. *Total no. species* is the number of species present in the seed rain. *Unique species*  
 51 *No. (%)* is the number and percentage of species respectively that are unique in the seed rain. *All*  
 52 *species No. (%)* is the total number and percentage of species respectively which are present in the  
 53 seed rain. *Shared species No. (%)* is the total number and percentage of species respectively which  
 54 are present in both the successional and the mature forest. All percentages are calculated based on  
 55 the total number of species.

| Forest successional age | Total no. species | Successional forests   | Mature Forest       |                        | Shared species No. (%) |
|-------------------------|-------------------|------------------------|---------------------|------------------------|------------------------|
|                         |                   | Unique species No. (%) | All species No. (%) | Unique species No. (%) |                        |
| A1 (12)                 | 86                | 35 (41%)               | 51 (59%)            | 35 (41%)               | 16 (18%)               |
| B1 (15)                 | 90                | 39 (43%)               | 51 (57%)            | 42 (47%)               | 9 (10%)                |
| C1 (20)                 | 88                | 37 (42%)               | 51 (58%)            | 36 (41%)               | 15 (17%)               |
| D1 (25)                 | 87                | 36 (41%)               | 51 (59%)            | 38 (44%)               | 13 (15%)               |
| A2 (32)                 | 70                | 19 (27%)               | 51 (73%)            | 23 (33%)               | 28 (40%)               |
| B2 (35)                 | 71                | 20 (28%)               | 51 (72%)            | 39 (55%)               | 12 (17%)               |
| C2 (40)                 | 69                | 18 (26%)               | 51 (74%)            | 31 (45%)               | 20 (29%)               |
| D2 (45)                 | 67                | 16 (24%)               | 51 (76%)            | 34 (51%)               | 17 (25%)               |

57 **Figure S1.** Map of the study region in Sarapiquí, Costa Rica, showing the locations of the five  
58 forest plots of different successional ages (A-D; red dots) and the mature forest (M; blue dot).  
59 Successional plots were sampled in two time periods, 1997-1999 with plot ages varying from 12  
60 to 25 in 1997 and 2015-2017 with plots ages varying from 32 to 45 years old in 2017. The mature  
61 forest was sampled only in 2015-2017. See Table 1 in the main text for the details for each forest  
62 plot. The map was constructed using the *get\_map* function in the *ggmap* package (Kahle and  
63 Wickham 2013).

64

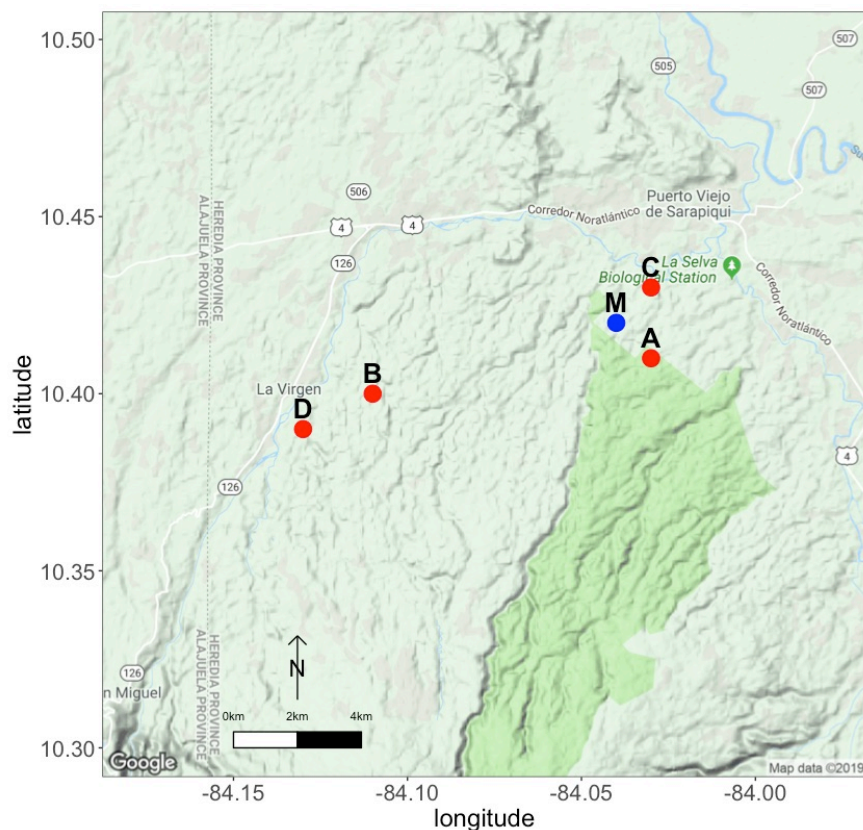

65

66 **Figure S2.** (a) Variation in the seed rain across four successional forest plots by months over two  
 67 time periods in Sarapiquí, Costa Rica. Successional plots were sampled in two time periods, 1997-  
 68 1999 (A-D) with plot ages varying from 12 to 25 in 1997 and 2015-2017 (A-D) with plots ages  
 69 varying from 32 to 45 years old in 2017 (Table 1). Different colors represent the different forest  
 70 plots; the 1997-1999 and 2015-2017 data are represented by a continuous and a dotted line,  
 71 respectively. (b) Differences in average abundance of seeds rain across four successional forest  
 72 plots and at two time periods (1997 – 1999 in red and 2015 – 2017 in blue) in Sarapiquí, Costa  
 73 Rica, after controlling for variation in seed abundance by species. See Table 1 in the main text for  
 74 details about each forest plot.

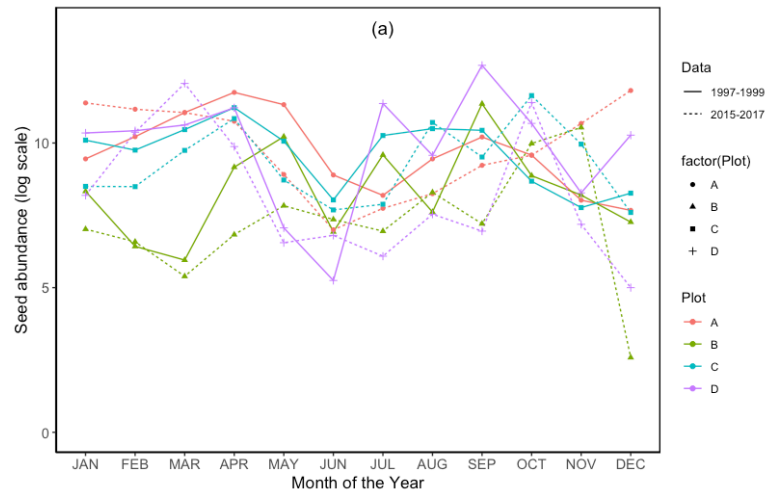

75

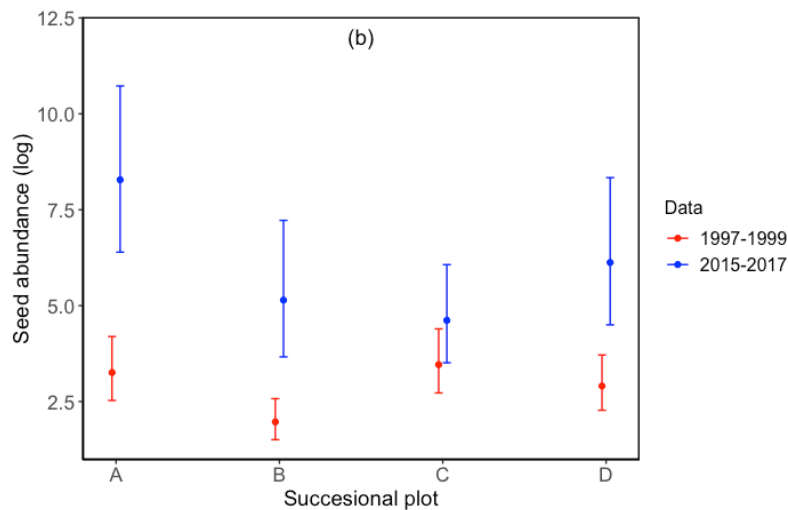

76

77 **Figure S3.** Abundance of woody species in the seed rain summed across four secondary forest  
 78 plots in Sarapiquí, Costa Rica. The figure shows the 32 species that are higher or lower than the  
 79 average seed abundance across all species. Nine species were significantly lower in abundance,  
 80 and 23 species were higher in abundance, than the mean abundance across all species. Species  
 81 abbreviations correspond to the first three letters of the genus and species (Table S1).

82

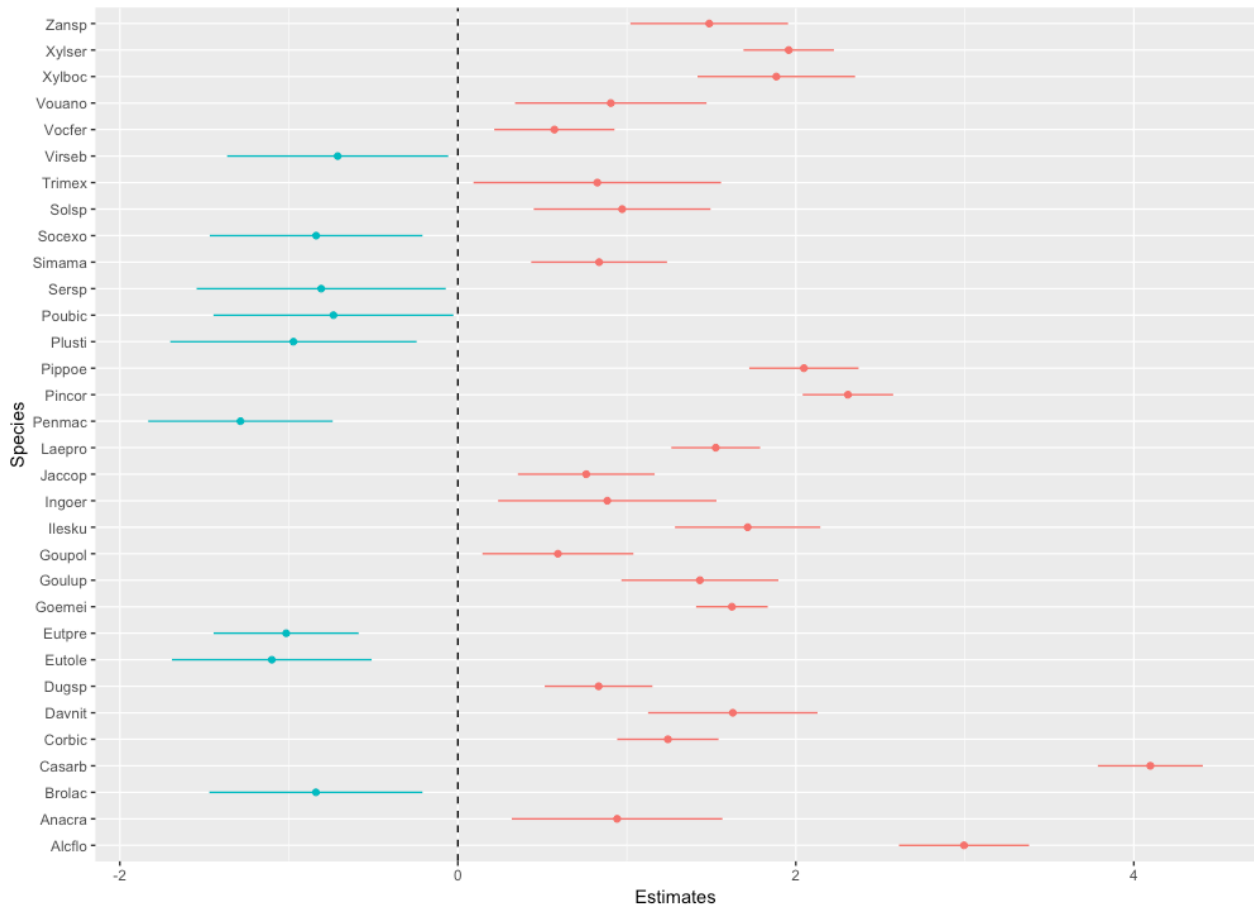

83

84 **Figure S4.** Abundance of seed rain across all secondary forests plots for species represented in  
 85 seed traps continuously during all twelve months during 1997-1999 (top panel) and 2015-2017  
 86 (bottom panel) in Sarapiquí, Costa Rica. Species in 1997-1999 are light-demanding lianas  
 87 (*Aristolochia sprucei* and *Pinzona coriacea*) or light-demanding tree species (*Cordia bicolor* and  
 88 *Zanthoxylum sp.*). Species in 2015-2017 are two shade tolerant palms (*Euterpe precatoria* and  
 89 *Welfia regia*) and two light-demanding trees (*Goethalsia meiantha* and *Laetia procera*). Species  
 90 abbreviations correspond to the first three letters of the genus and species (Table S1). See Table  
 91 1 in the main text for details about the successional forest plots.

92

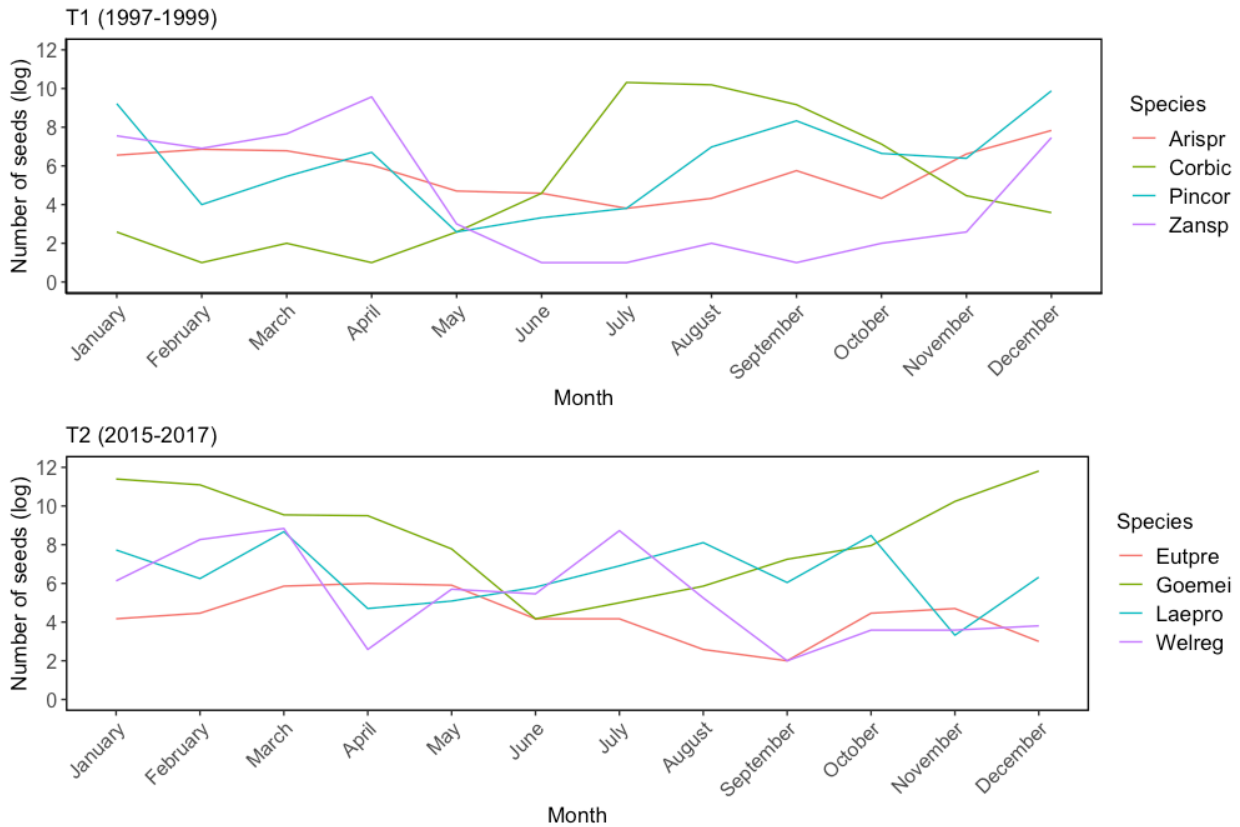

93

**Figure S5.** Null distributions of expected random Schoener's ( $C_{ij}$ ) co-occurrence indexes for species in successional vs mature forest plots, compared to the observed value, for each plot of different successional age. A1, B1, C1, D1 and A2, B2, C2, D2 represent successional plots in the 1997-1999 and 2015-2017 time periods, respectively. The red line represents the observed value, and the blue line is the mean, and the dotted blue lines are the 2.5th and 97.5th quantiles, of the null distribution. The standardized effect size of the co-occurrence index was calculated as the deviation of the observed value from the mean of the null distribution divided by the standard deviation of the null distribution.

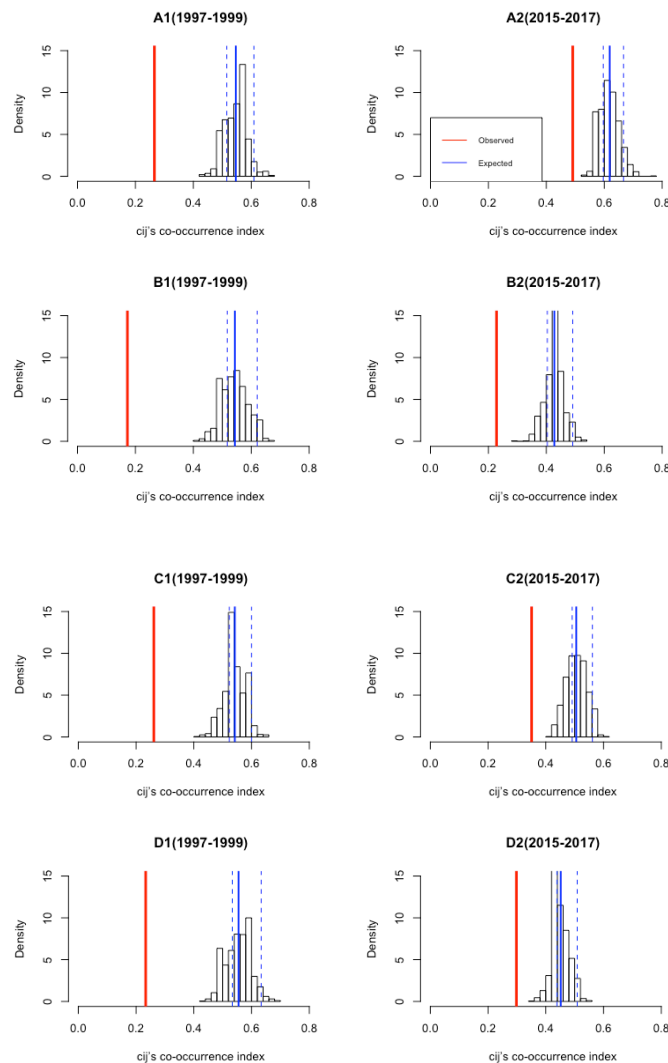

**Figure S6.** Species accumulation curves based on rarefaction of the seed rain in four successional (A-D) and mature (M) forest plots in Sarapiquí, Costa Rica. Successional plots were sampled in 1997-1999 (A1-D1 in red) and 2015-2017 (A2-D2 in blue), and the mature forest (M in black) was sampled only in 2015-2017. Plot successional ages: A1 = 12 B1 = 15, C1 = 20, D1 = 25, A2 = 32, B2 = 35, C2 = 40, and D2 = 45 years old. (a) small seeds ( $\leq 6$  mm) and (b) large seeds ( $> 6$  mm); (c) seeds of light demanding and (d) species shade tolerant species; (e) seeds of non-animal dispersed and (f) animal-dispersed species.

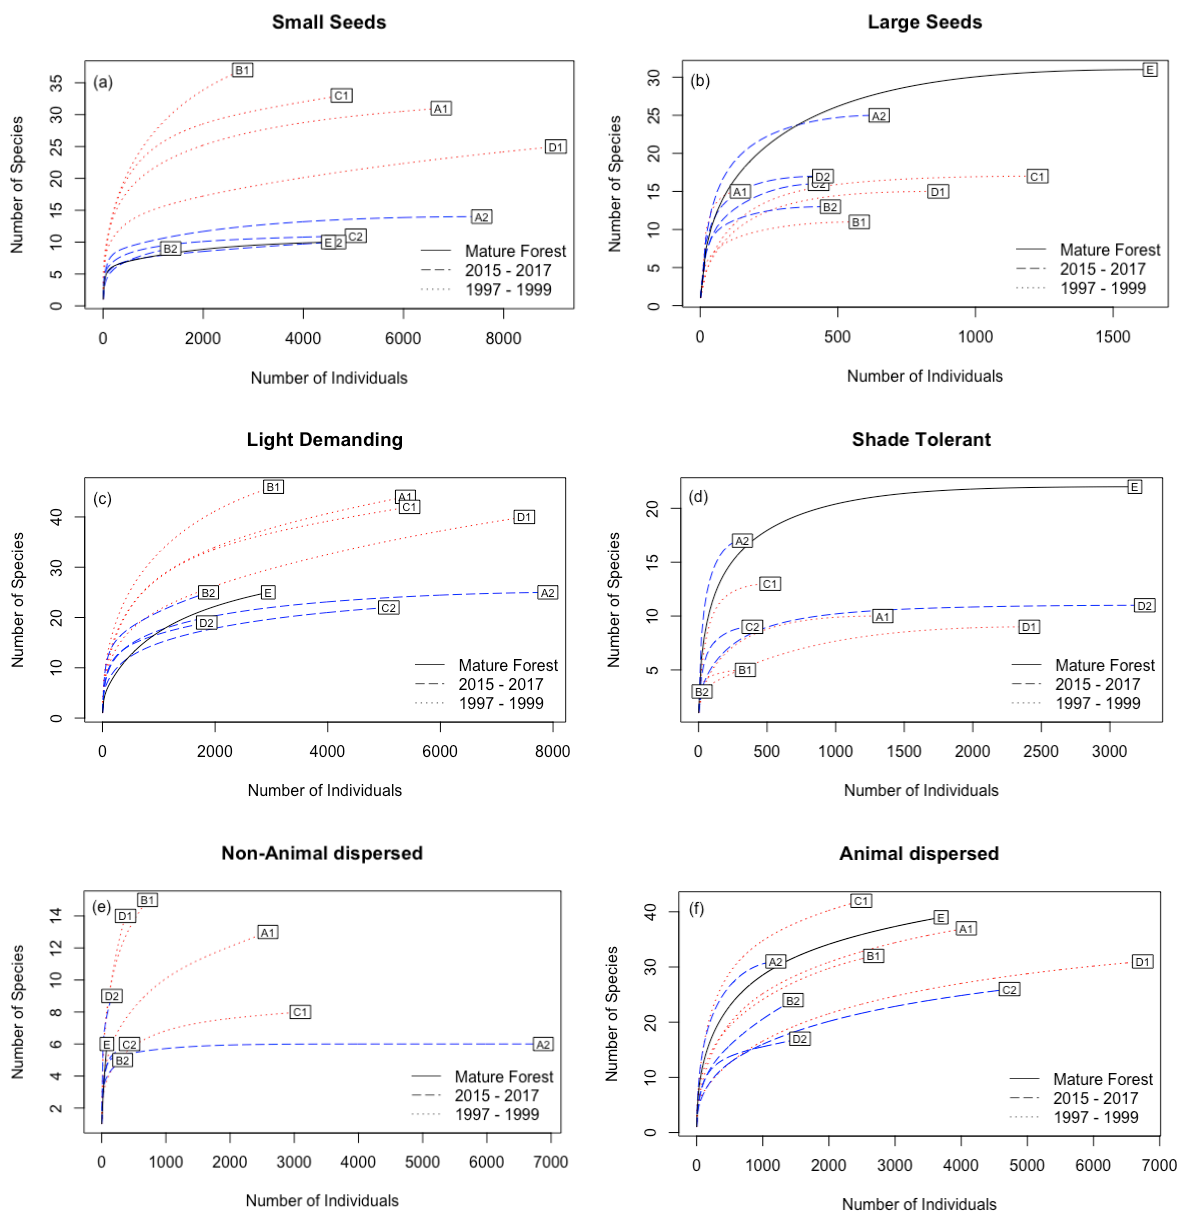

**Figure S7.** Decreasing proportion of immigrant seeds in secondary forests of increasing successional age in Sarapiquí, Costa Rica. The black line is the best fit line from ordinary least squares regression, and the gray shading indicates the confidence interval on the fit.

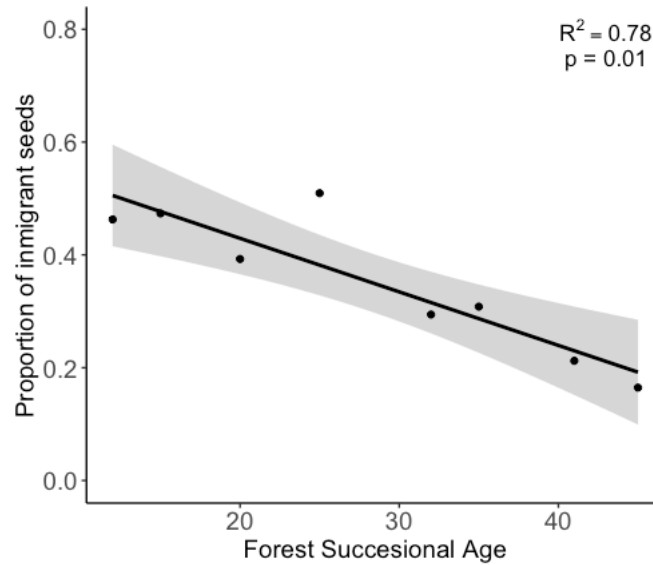

#### LITERATURE CITED

Kahle, D., and H. Wickham. 2013. ggmap: spatial visualization with ggplot2. R Journal 5: 144–
